# Supplementary figures and images for: Erlotinib exhibits antineoplastic off-target effects in AML and MDS: a preclinical study
Source: Oxford University Press journal article supplement (doi:10.1182/blood-2007-07-100362), 2007-10-10

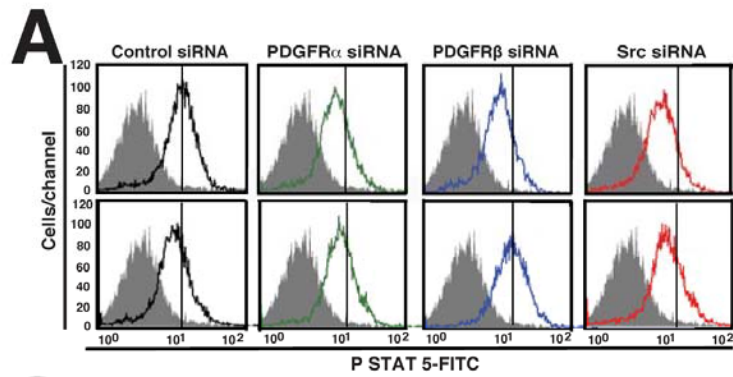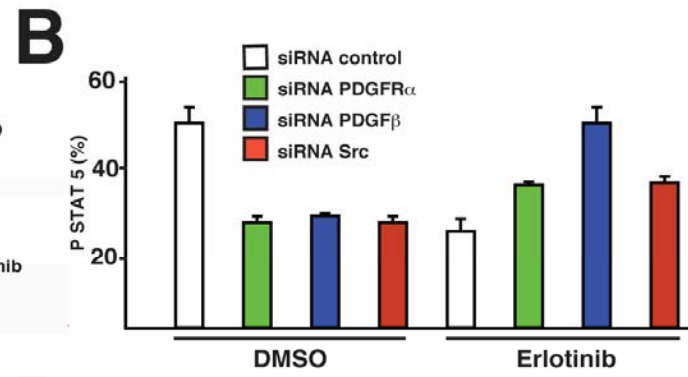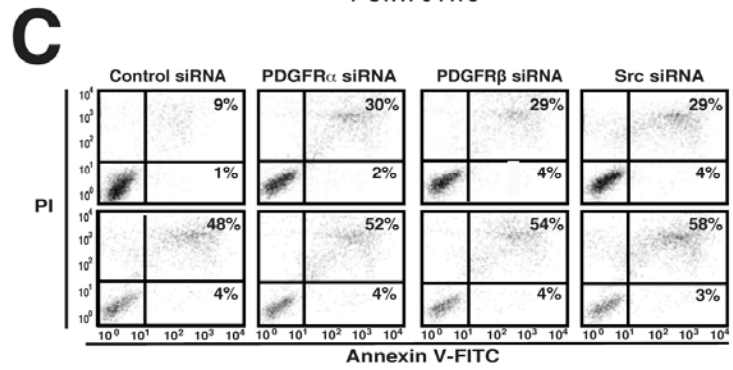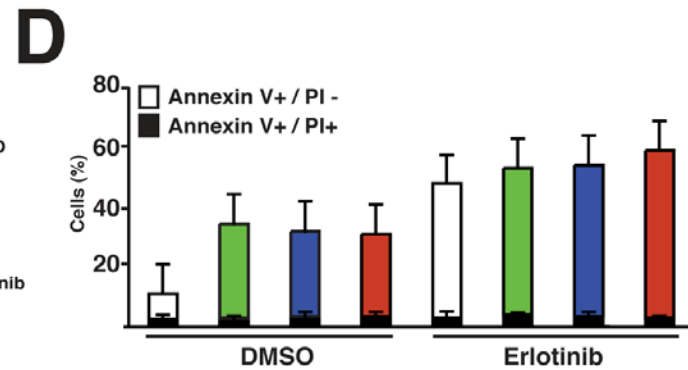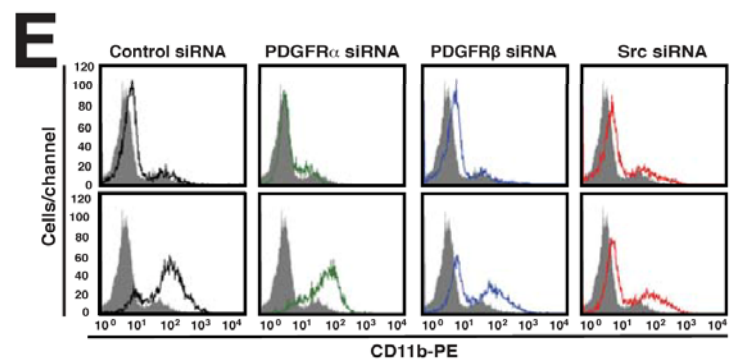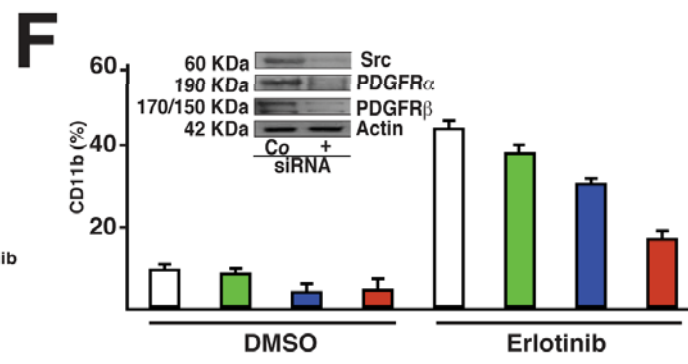

Supplement: zh2170-sup-figures1.pdf [file zh2170-sup-figures1.pdf]
